# Supplementary material
Source: PubMed Central journal article supplement (PMC5205574)
Supplement: NIHMS723241-supplement-Supp_Info.pdf [file NIHMS723241-supplement-Supp_Info.pdf]

Supplementary material for

**Data-driven models of foot-and-mouth disease dynamics: a review.**

Laura W. Pomeroy\*, Shweta Bansal, Michael Tildesley, Karla I. Moreno Torres, Mark Moritz, Ningchuan Xiao, Tim E. Carpenter, and Rebecca B. Garabed.

\*to whom correspondence should be addressed; email: pomeroy.26@osu.edu

This PDF file includes:

Materials and methods, Results, Note, References

Analysis of references (figures S1 – S5)

Table captions

Notation and codes used in the database of references (Table S1)

Database of references (Table S2)

Citations for Interspread, AusSpread, and NAADSM use (Table S3)

## **Materials and methods.**

### *Literature Search*

We performed the literature search on March 22, 2015 using Web of Science. We searched over all years with

foot and mouth disease

AND model OR dynamic\* OR simulat\* OR mathematic\* OR stochastic\* OR determinis\* OR compartmental OR transmission OR reproducti\* OR R0 OR estimat\* OR sensitivit\* OR epidemi\* OR endemi\*

NOT hand OR mouse OR quasispecies

in the *topic* heading of the search tool. Search terms were motivated, in part, by Lloyd-Smith et al. (2009).

We compare counts of FMDV dynamical models with total counts of all publications on FMDV (Fig. S1). To find all publications, we searched each year between 1976 and 2012 with

foot and mouth disease

NOT hand

in the *topic* heading.

### *Categorizing the models*

We use five features to categorize models:

1. How the model represents host species diversity.
2. How the model represents farm location and connectivity.
3. How the model represents transmission: within farm, between farm, considering unreported cases, and/or considering carrier animals.
4. How the model represents control: none, unspecified, movement restrictions, vaccination, and/or culling.
5. Types of data used with the model.

Results are tabulated in the database (Table S1-S2), summarized in the figures (S1-S5).

FMDV models represent transmission on two spatial scales: among farms and within farms. Alternatively, some models represent within farm transmission in proxy, using time-varying levels of infectiousness for a farm (Chis Ster et al., 2009). Since models with time-varying infectiousness do not explicitly model within farm dynamics, we did not score them as such in Figure S3 and Table S2.

Models represent three strategies for FMDV control: animal movement restrictions, vaccination campaigns, or culls of infected and possibly susceptible animals. Some models explicitly incorporate one or more method of control. Yet, many models implicitly incorporate control by making inference on data collected during control campaigns. We designated implicit control by an asterisk (\*) in both Figure S4 and Table S2.

As a criterion for inclusion in this review, models use data on host abundance and/or distribution, disease incidence or prevalence, or both. In Table S2, we attempt to distinguish between more and less robust national measures of host abundance by classifying more robust measures as “national registries” and less robust measures as “national censuses” (Tables S1 and S2). Admittedly, this classification is subjective, so graphical analysis of data usage collapsed the two categories and represented both types of data as “host registry” (Figure S5).

#### *Note*

Interspread, AusSpread, and NAADSM are three modeling frameworks in which users can include variables by choosing from supported options. We summarize publishing output in Table S3. While publications detail which variables and data are included in the model, relationships among variables are not clearly stated, preventing understanding of methodology for modeling farm connectivity. Therefore, models using Interspread, AusSpread, and NAADSM have been excluded from the database of references (Table S2). However, locations modeled in references using Interspread, AusSpread, and NAADSM are included in Figure 3.

#### *References*

- Chis Ster, I., B. K. Singh and N. M. Ferguson, 2009: Epidemiological inference for partially observed epidemics: the example of the 2001 foot and mouth epidemic in Great Britain. *Epidemics*, 1, 21-34.
- Lloyd-Smith, J. O., D. George, K. M. Pepin, V. E. Pitzer, J. R. C. Pulliam, A. P. Dobson, P. J. Hudson and B. T. Grenfell, 2009: Epidemic Dynamics at the Human-Animal Interface. *Science*, 326, 1362-1367.

## Analysis of references

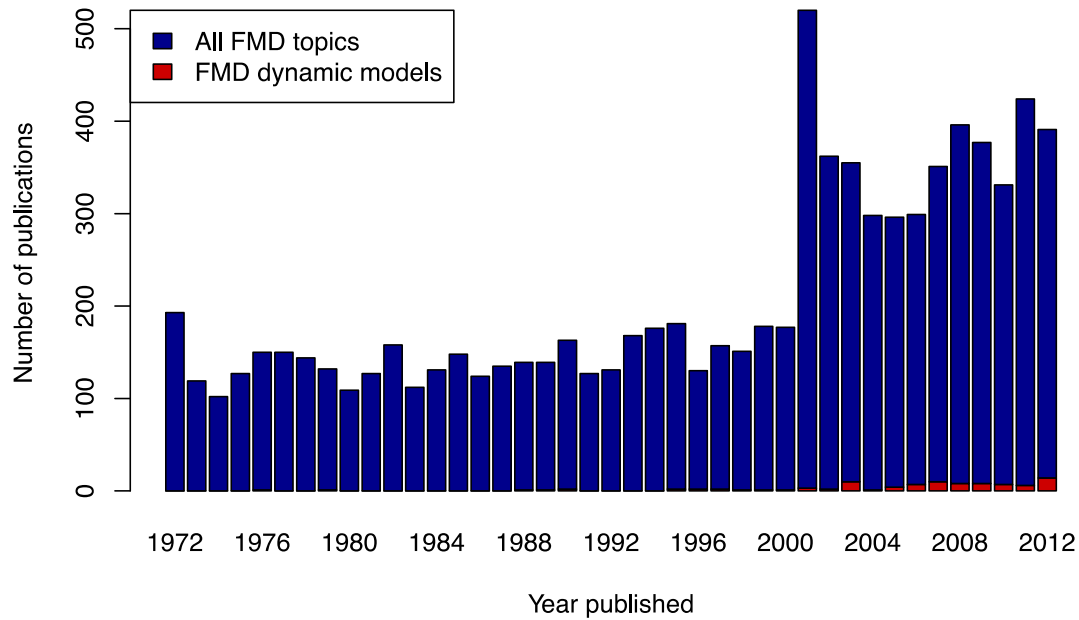

**Figure S1. Historical publishing effort of articles relating to FMDV.** Articles on FMDV dynamic models are represented in red, while publications on all other FMDV topics are represented in blue. Years of high effort in FMDV dynamical models publishing include 2003, 2007, and 2012 with 10, 10, and 14 articles published, respectively. Publication effort of FMDV models has increased over time, in proportion with the increase in publication effort for all FMDV studies across disciplines.

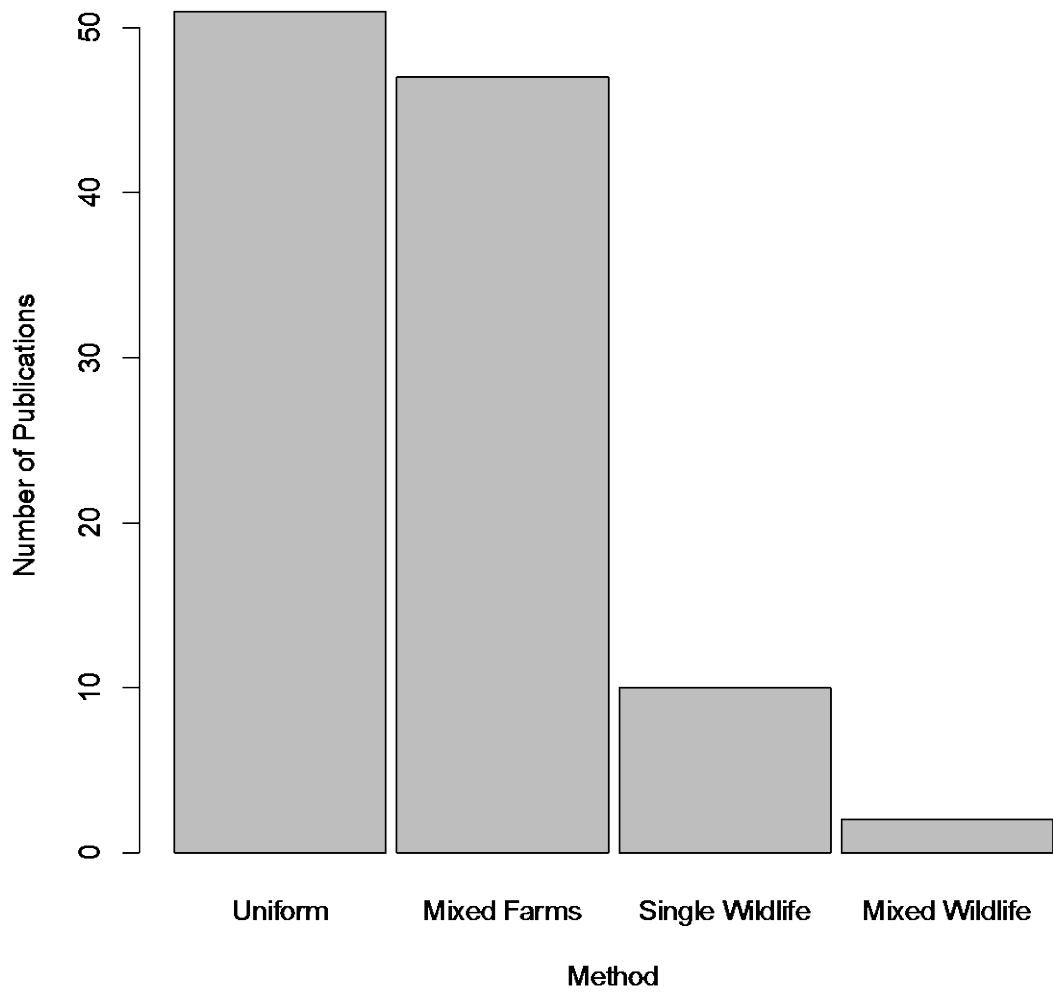

**Figure S2. Species diversity in FMDV models.** Host species diversity has been depicted in FMDV models as mixed farms, single wildlife species, or mixed wildlife species, or is absent with a uniform representation for all hosts. Frequency of use differs among methodologies.

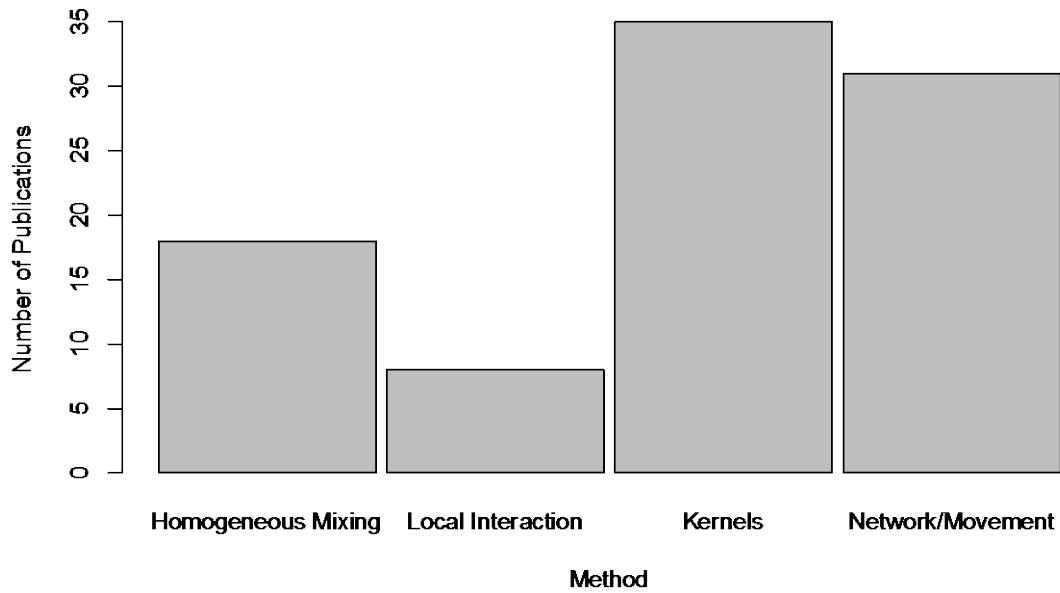

**Figure S3. Transmission in FMDV models.** Models reviewed here represent six methods to represent of FMDV transmission: (1) homogeneous mixing, (2) local interactions, (3) distance-based transmission kernels, and (4) network or host movement models. Frequency of use varies, with kernels being the most frequently employed methodology.

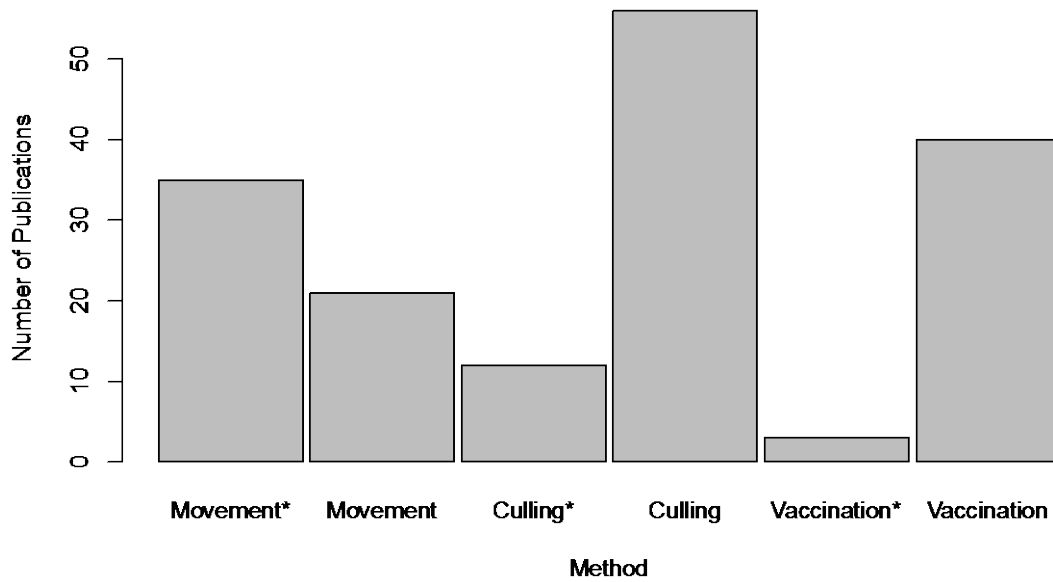

**Figure S4. Control in FMDV models.** Models reviewed here represent movement restrictions, vaccination campaigns, and animal culls. We distinguish between explicit and implicit (\*) models of control; the latter indicating inference made on disease data collected during control campaigns. Frequency of use in models differs among control strategies as shown.

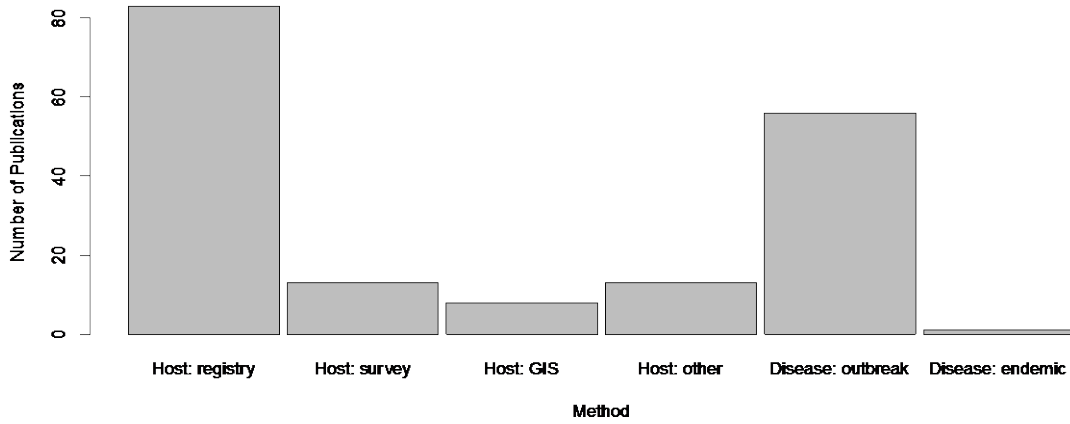

**Figure S5. Use of data in FMD models.** Host abundance and disease incidence or prevalence data can parameterize models of FMDV transmission or control. Sources of data on host abundance include national databases, registries, or census, investigator directed surveys, land-use or geographical information systems (GIS) data, or other sources. Sources of disease data include incidence time-series from outbreaks or endemic case reports. Frequency of use in models differs among data sources as shown.



## **Table captions.**

**Table S1. Notation and codes used in the database of references.** Descriptions model methods, with codes used in the database of references. Note that various methods of control are implicitly modeled (\*) by performing inference on disease data collected simultaneously with control campaigns.

**Table S2. Database of references.** Ninety-five references are listed, categorized on methods used to incorporate species diversity, farm location and connectivity, FMDV transmission and control, and use of data.

**Table S3. Citations for Interspread, AusSpread, and NAADSM model use.** While publications that use Interspread, AusSpread, or NAADSM cannot be included in the database of references due to insufficient information for categorization, they are listed here along with the outbreak they represent.

**Table S1. Notation and codes used in the database of references**

| Heading                              | Notation           | Definition                                                                                                                                                                                              |
|--------------------------------------|--------------------|---------------------------------------------------------------------------------------------------------------------------------------------------------------------------------------------------------|
| Location:<br>Farm<br>connectivity    | kernel (1)         | Spatial transmission kernel estimated by DEFRA using data from contact tracing post-movement ban during the UK 2001 FMDV epidemic                                                                       |
|                                      | kernel (2)         | Spatial transmission kernel estimated using incidence from the entire duration of the UK 2001 FMDV outbreak                                                                                             |
|                                      | kernel (3)         | Multiple spatial transmission kernels estimated using incidence data from the entire duration of the UK 2001 FMDV epidemic; kernels were estimated pre/post movement ban and pre/post increased culling |
|                                      | kernel (4)         | Spatial transmission kernel estimated using incidence from the entire duration of an epidemic other than 2001 UK                                                                                        |
|                                      | kernel (5)         | Exponential distance-based decay                                                                                                                                                                        |
|                                      | kernel (6)         | kernel (1) with probability equal to 1 at very short distances                                                                                                                                          |
|                                      | kernel (7)         | Geometric change point kernel plus additional infections                                                                                                                                                |
|                                      | kernel (8)         | Inverse distance for local contacts with a fixed probability of infection from long-range contacts                                                                                                      |
|                                      | kernel (9)         | Cauchy-type kernel                                                                                                                                                                                      |
|                                      | kernel (10)        | Radial function                                                                                                                                                                                         |
|                                      | metapopulation     | Spatial patches of hosts with transmission among patches                                                                                                                                                |
|                                      | mvmt               | Based directly on records of host movement between farms                                                                                                                                                |
|                                      | mvmt. model        | Spatial host movement model based on production type, herd size, distance, and contact probabilities                                                                                                    |
|                                      | local interaction  | Specified distance-based interactions at a local scale; commonly used in cellular or geographic automata models                                                                                         |
|                                      | pair approximation | Spatial structure imposed implicitly as pairwise clusters of are defined over which transmission may occur                                                                                              |
|                                      | network-opinion    | Contact network with probability of disease transmission over edges determined by expert opinion                                                                                                        |
|                                      | network            | Network of all means of contact that could cause FMDV transmission                                                                                                                                      |
|                                      | homogeneous (1)    | Homogeneous mixing among entire study population                                                                                                                                                        |
|                                      | homogeneous (2)    | Multiple geographic regions defined with homogeneous mixing within each region and no connection among regions                                                                                          |
|                                      | route              | Milk tanker routes connecting geographically distinct farms with the potential to transmit infection between farms                                                                                      |
| Transmission:<br>unobserved<br>cases | 1                  | Exposed (latent) state or time delay to infectiousness: explicitly defined or determined by sensitivity analysis                                                                                        |
|                                      | 2                  | Undetected infected farms culled as a part of the contiguous or ring culls (in UK)                                                                                                                      |
|                                      | 3                  | Silent spread before detection of infected farm                                                                                                                                                         |

| Heading       | Notation | Definition                                                                                                      |
|---------------|----------|-----------------------------------------------------------------------------------------------------------------|
| Control       | X        | Explicitly modeled                                                                                              |
|               | X*       | Implicitly modeled as a byproduct of making inference on data collected while the control measure was practiced |
|               | 1        | Reduction in cases                                                                                              |
|               | 2        | Reduction in carriers                                                                                           |
|               | 3        | Explicit economic costs                                                                                         |
| Data: Host    | 1        | Data from a national registry                                                                                   |
|               | 2        | Data from a national census                                                                                     |
|               | 3        | Investigator-directed survey                                                                                    |
|               | 4        | GIS land cover data                                                                                             |
|               | 5        | Other                                                                                                           |
|               | unk      | Unknown                                                                                                         |
| Data: Disease | 1        | Epidemic time-series data used in parameter estimation                                                          |
|               | 2        | Endemic case reports data used in parameter estimation                                                          |
|               | 3        | Endemic serology data used in parameter estimation                                                              |
|               | 4        | Parameter estimates (originally obtained from outbreak data in another population) used for simulation          |
|               | 5        | Other                                                                                                           |

**Table S2. Database of references.**

| Reference                | Species diversity |                     |                 |                | Location    |                              | Transmission |              |                  |          | Control |                     |                   |             |         | Data               |      |         |
|--------------------------|-------------------|---------------------|-----------------|----------------|-------------|------------------------------|--------------|--------------|------------------|----------|---------|---------------------|-------------------|-------------|---------|--------------------|------|---------|
|                          | Uniform           | Mixed species farms | Single wildlife | Mixed wildlife | Country     | Farm connectivity            | Within farm  | Between farm | Unobserved cases | Carriers | None    | Unspecified / other | Mvmt. Restriction | Vaccination | Culling | Metrics for impact | Host | Disease |
| Ap Dewi et al., 2004     | X                 |                     |                 |                | UK          | homogeneous (1)              |              | X            | 3                |          |         | X                   |                   |             |         | 1                  | 1    | 5       |
| Arnold et al., 2008      |                   | X                   |                 |                | UK          | kernel (2)                   |              | X            | 1                | X        |         |                     | X*                | X           | X*      | 1,2                | 1    | 0,4     |
| Backer et al., 2012      |                   | X                   |                 |                | Netherlands | kernel (4)                   | X            | X            | 1,3              |          |         |                     | X*                | X           | X       | 1                  | 1,3  | 0,4     |
| Bajardi et al., 2012     | X                 |                     |                 |                | Italy       | mvmt                         |              | X            |                  |          |         | X                   |                   |             |         | 1                  | 1    | 0       |
| Bates et al., 2003a      | X                 |                     |                 |                | US          | network-opinion              | X            | X            | 1                |          |         |                     | X                 | X           | X       | 1                  | 2,3  | 0       |
| Bates et al., 2003b      | X                 |                     |                 |                | US          | network-opinion              | X            | X            | 1                |          |         |                     | X                 | X           | X       | 1                  | 2,3  | 0       |
| Boender et al., 2010     |                   | X                   |                 |                | Netherlands | kernel (4)                   |              | X            |                  |          |         |                     | X*                | X           | X       | 1                  | 1    | 1       |
| Bokland et al., 2013     |                   | X                   |                 |                | Denmark     | network-opinion              |              | X            | 1                |          |         | X                   | X                 | X           | X       | 1,3                | 1    | 0       |
| Bouma et al., 2003       | X                 |                     |                 |                | Netherlands | homogeneous (1)              |              | X            |                  |          |         |                     | X*                | X*          | X*      | 1                  | 1    | 1       |
| Buhnerkempe et al., 2014 | X                 |                     |                 |                | US          | mvmt model                   |              | X            | 1                |          |         |                     | X                 |             |         | 1                  | 3    | 0       |
| Carpenter et al., 2007   | X                 |                     |                 |                | US          | network-opinion              | X            | X            | 1                |          | X       |                     |                   |             |         | 1                  | 2,3  | 0       |
| Carpenter et al., 2011   | X                 |                     |                 |                | US          | network-opinion              | X            | X            | 1                |          |         |                     | X                 | X           | X       | 1,3                | 2,3  | 0       |
| Chis Ster et al., 2007   |                   | X                   |                 |                | UK          | kernel (3)                   |              | X            | 1                |          |         |                     | X*                |             | X*      | 1                  | 1    | 1       |
| Chis Ster et al., 2009   |                   | X                   |                 |                | UK          | kernel (3)                   |              | X            | 2                |          |         |                     | X*                |             | X*      | 1                  | 1    | 1       |
| Chis Ster et al., 2012   |                   | X                   |                 |                | UK          | kernel (3)                   | X            | X            | 1,3              |          |         |                     | X*                |             | X*      | 1                  | 1    | 1       |
| Chowell et al., 2006     | X                 |                     |                 |                | Uruguay     | kernel (5),<br>metapopulaton | X            | X            | 1,3              |          |         |                     | X                 | X           |         | 1                  | 5    | 1       |
| Deardon et al., 2010     |                   | X                   |                 |                | UK          | kernel (7)                   |              | X            | 1                |          |         |                     | X*                | X           | X       | 1                  | 1    | 1       |
| Deardon et al., 2012     |                   | X                   |                 |                | UK          | kernel (5)                   |              | X            | 1                |          |         |                     | X*                | X           | X       | 1                  | 1    | 1       |
| Dexter, 2003             |                   |                     | X               |                | Australia   | n/a                          | X            |              | 1                |          |         |                     |                   |             |         | 1                  | 5    | 0       |
| Dickey et al., 2008      | X                 |                     |                 |                | US          | network-opinion              |              | X            | 1,3              |          |         | X                   | X                 |             | X       | 1                  | 2,3  | 0       |
| Diggle 2006              |                   | X                   |                 |                | UK          | kernel (2)                   |              | X            | 1                |          |         |                     | X*                |             | X       | 1                  | 1    | 1       |
| Dijkhuizen, 1989         | X                 |                     |                 |                | Netherlands | homogeneous (1)              |              | X            |                  |          |         |                     |                   | X           | X       | 1,3                | unk  | 0       |
| Doran & Laffan, 2005     |                   | X                   | X               |                | Australia   | local interaction            |              | X            | 1                |          | X       |                     |                   |             |         | 1                  | 1,2  | 0       |
| Durand & Mahul, 1999     |                   | X                   |                 |                | France      | homogeneous (2)              | X            | X            | 1,3              |          |         |                     | X                 | X           |         | 1                  | 2    | 0       |
| Estrada et al., 2008     | X                 |                     |                 |                | Peru        | homogeneous (1)              |              | X            |                  |          | X       |                     |                   |             |         | 1                  | 0    | 1       |

| Reference                   | Species diversity |                     |                 |                | Location     |                    | Transmission |              |                  |          | Control |                     |                   |             |         | Data               |      |         |
|-----------------------------|-------------------|---------------------|-----------------|----------------|--------------|--------------------|--------------|--------------|------------------|----------|---------|---------------------|-------------------|-------------|---------|--------------------|------|---------|
|                             | Uniform           | Mixed species farms | Single wildlife | Mixed wildlife | Country      | Farm connectivity  | Within farm  | Between farm | Unobserved cases | Carriers | None    | Unspecified / other | Mvmt. Restriction | Vaccination | Culling | Metrics for impact | Host | Disease |
| Ferguson et al., 2001a      | X                 |                     |                 |                | UK           | pair approximation |              | X            | 1                |          |         |                     | X*                | X           | X       | 1                  | 1    | 1       |
| Ferguson et al., 2001b      |                   | X                   |                 |                | UK           | pair approximation |              | X            | 1                |          |         |                     | X*                |             | X       | 1                  | 1    | 1       |
| Garner & Lack, 1995a        |                   | X                   |                 |                | Australia    | homogeneous (2)    |              | X            | 1                |          |         |                     | X                 | X           | 1,3     | 1                  | 0    |         |
| Garner & Lack, 1995b        | X                 |                     |                 |                | Australia    | homogeneous (2)    |              | X            | 1                |          |         |                     | X                 | X           | 1,3     | 1                  | 0    |         |
| Gerbier et al., 2002        | X                 |                     |                 |                | UK           | kernel (8)         |              | X            |                  |          |         |                     |                   | X           | 1       | 1                  | 1    |         |
| Gilbert et al., 2005        |                   | X                   |                 |                | Turkey       | kernel (5)         |              | X            |                  |          |         |                     | X*                |             | 1       | 1                  | 1    |         |
| Green et al., 2006          | X                 |                     |                 |                | UK           | mvmt, kernel (5)   |              | X            | 1,3*             |          |         | X                   |                   |             | 1       | 1,2                | 0    |         |
| Halasa et al., 2013         |                   | X                   |                 |                | Denmark      | network-opinion    |              | X            | 1                |          | X       | X                   |                   | X           | 1,3     | 1                  | 0    |         |
| Halasa et al., 2014 (March) |                   | X                   |                 |                | Denmark      | network-opinion    |              | X            | 1                |          | X       | X                   |                   | X           | 1,3     | 1                  | 0    |         |
| Halasa et al., 2014 (July)  |                   | X                   |                 |                | Denmark      | network-opinion    |              | X            | 1                |          | X       | X                   |                   | X           | 1,3     | 1                  | 0    |         |
| Handel et al., 2011         |                   | X                   |                 |                | UK           | kernel (2)         |              | X            | 1,3              |          | X       |                     | X*                |             | X*      | 1                  | 1    | 4       |
| Hayama et al., 2013         |                   | X                   |                 |                | Japan        | kernel (4)         |              | X            |                  |          |         | X*                  | X                 | X*          | 1       | 1                  | 1    |         |
| Haydon et al., 1997         | X                 |                     |                 |                | UK           | homogeneous (1)    |              | X            |                  |          | X       |                     |                   |             | 1       | 1                  | 1    |         |
| Heuer et al., 2007          |                   | X                   |                 |                | New Zealand  | n/a                | X            |              | 1,3              |          | X       |                     |                   |             | 1       | 1,3                | 0    |         |
| Highfield et al., 2008      |                   |                     | X               |                | US           | local interaction  |              | X            | 1                |          | X       |                     |                   |             | 1       | 4,5                | 0    |         |
| Highfield et al., 2009      |                   |                     | X               |                | US           | local interaction  |              | X            | 1                |          | X       |                     |                   |             | 1       | 4                  | 0    |         |
| Highfield et al., 2010a     |                   |                     | X               |                | US           | local interaction  |              | X            | 1                |          | X       |                     |                   | X           | 1       | 4,5                | 0    |         |
| Highfield et al., 2010b     |                   |                     | X               |                | US           | local interaction  |              | X            | 1                |          | X       |                     |                   | X           | 1       | 4,5                | 0    |         |
| Hone & Pech, 1990           |                   |                     | X               |                | Australia    | n/a                | X            |              | 1,3              |          | X       |                     |                   |             | 1       | 5                  | 0    |         |
| Hosseinkashi et al., 2012   |                   | X                   |                 |                | UK           | network            |              | X            |                  |          |         |                     |                   |             | 1       | 1                  | 1    |         |
| Howard & Donnelly, 2000     | X                 |                     |                 |                | Taiwan, UK   | homogeneous (1)    |              | X            | 1                |          |         | X*                  |                   | X           | 1       | 1                  | 1    |         |
| Hughjones, 1976             | X                 |                     |                 |                | UK           | route              |              | X            | 1                |          | X       |                     |                   |             | 1       | 1                  | 0    |         |
| Hutber et al., 1996         | X                 |                     |                 |                | Saudi Arabia | n/a                | X            |              | 1                |          |         |                     | X                 |             | 1       | 1                  | 5    |         |
| Hutber et al., 1998         | X                 |                     |                 |                | Saudi Arabia | n/a                | X            |              | 1                |          |         |                     | X                 |             | 1       | 1                  | 5    |         |
| Jewell et al., 2009         |                   | X                   |                 |                | UK           | kernel (9)         |              | X            |                  |          |         | X*                  |                   | X           | 1       | 1                  | 1    |         |
| Kao, 2003                   |                   | X                   |                 |                | UK           | kernel (2)         |              | X            | 1,3              |          |         | X*                  |                   | X           | 1       | 1                  | 1    |         |
| Kao et al., 2006            | X                 |                     |                 |                | UK           | mvmt               |              | X            |                  |          | X       |                     |                   |             | 1       | 1                  | 0    |         |
| Kao et al., 2007            | X                 |                     |                 |                | UK           | mvmt               |              | X            |                  |          | X       |                     |                   |             | 1       | 1                  | 5    |         |

| Reference                   | Species diversity |                     |                 |                | Location                         |                             | Transmission |              |                  |          | Control |                     |                   |             |         | Data               |      |
|-----------------------------|-------------------|---------------------|-----------------|----------------|----------------------------------|-----------------------------|--------------|--------------|------------------|----------|---------|---------------------|-------------------|-------------|---------|--------------------|------|
|                             | Uniform           | Mixed species farms | Single wildlife | Mixed wildlife | Country                          | Farm connectivity           | Within farm  | Between farm | Unobserved cases | Carriers | None    | Unspecified / other | Mvmt. Restriction | Vaccination | Culling | Metrics for impact | Host |
| Keeling et al., 2001        |                   | X                   |                 |                | UK                               | kernel (1)                  |              | X            | 1                |          |         | X*                  | X                 | X           | 1       | 1                  | 1    |
| Keeling et al., 2003        |                   | X                   |                 |                | UK                               | kernel (1)                  |              | X            | 1                |          |         | X*                  | X                 | X           | 1       | 1                  | 4    |
| Kiss et al., 2005           | X                 |                     |                 |                | UK                               | pair approximation, network |              | X            | 1                |          |         | X                   |                   | X           | 1       | 1                  | 4    |
| Kiss et al., 2006           |                   | X                   |                 |                | UK                               | mvmt                        |              | X            | 1,3*             | X        |         |                     |                   |             | 1       | 1                  | 0    |
| Klaring & Timischl, 1979    | X                 |                     |                 |                | Austria                          | homogeneous (1)             |              | X            |                  |          |         |                     | X                 | X           | 1       | 1                  | 1    |
| Klinkenberg et al., 2006    | X                 |                     |                 |                | UK                               | homogeneous (1)             |              | X            | 3                |          | X       |                     |                   |             | 1       | 0                  | 4    |
| Kobayashi et al., 2007a     | X                 |                     |                 |                | US                               | homogeneous (1)             |              | X            | 1                |          |         | X                   | X                 | X           | 1,3     | 2,3                | 0    |
| Kobayashi et al., 2007b     | X                 |                     |                 |                | US                               | homogeneous (1)             |              | X            | 1                |          |         | X                   | X                 | X           | 1,3     | 2,3                | 0    |
| Laffan et al., 2011         |                   | X                   |                 |                | US                               | local interaction           |              | X            | 1                | X        |         |                     |                   |             | 1       | 2                  | 0    |
| Lawson et al., 2011         | X                 |                     |                 |                | UK                               | homogeneous (1)             |              | X            |                  |          |         | X*                  |                   | X           | 1       | 1                  | 1    |
| Le Menach et al., 2005      |                   | X                   |                 |                | France                           | kernel (1)                  |              | X            | 1                |          |         | X*                  | X                 | X           | 1       | 2                  | 4    |
| Lindstrom et al., 2011      |                   | X                   |                 |                | Sweden                           | mvmt. model                 |              | X            |                  | X        |         |                     |                   |             | 1       | 1                  | 0    |
| Lindstrom et al., 2012      |                   | X                   |                 |                | Sweden                           | mvmt. model                 |              | X            |                  | X        |         |                     |                   |             | 1       | 1                  | 0    |
| Martinez-Lopez et al., 2014 |                   | X                   |                 |                | Peru                             | network                     | X            | X            | 1                |          | X       |                     |                   |             | 1       | 2                  | 0    |
| Matthews et al., 2003       | X                 |                     |                 |                | UK                               | metapopulation              |              | X            | 1                |          |         |                     |                   | X           | 1       | 1                  | 5    |
| Mardones et al., 2013       |                   | X                   |                 |                | US                               | network-opinion             |              | X            | 1                |          | X       | X                   |                   | X           | 1       | 2,3                | 0    |
| Orton et al., 2012          | X                 |                     |                 |                | UK                               | mvmt, kernel (5)            |              | X            | 1                | X        |         |                     |                   |             | 1       | 1                  | 0    |
| Parham et al., 2008         | X                 |                     |                 |                | UK                               | pair approximation          |              | X            | 1                |          |         |                     |                   | X           | 1       | 1                  | 0    |
| Pech & Hone, 1988           |                   |                     | X               |                | Australia                        | n/a                         | X            |              | 1                |          |         |                     |                   | X           | 1       | 5                  | 0    |
| Pech & McIlroy, 1990        |                   |                     | X               |                | Australia                        | n/a                         | X            |              | 1                |          |         |                     |                   |             | 1       | 5                  | 0    |
| Porphyre, et al., 2013      |                   | X                   |                 |                | Scotland                         | kernel (1)                  |              | X            | 1                |          |         | X                   | X                 | X           | 1       | 2                  | 0    |
| Pineda-Krch et al., 2010    | X                 |                     | X               |                | US                               | network-opinion             |              | X            | 1                |          |         | X                   |                   | X           | 1       | 2                  | 0    |
| Rautureau et al., 2012      |                   | X                   |                 |                | France                           | mvmt, network               | X            | X            | 1,3*             |          | X       |                     |                   |             | 1       | 1                  | 0    |
| Rich et al., 2007           | X                 |                     |                 |                | Argentina<br>Uruguay<br>Paraguay | metapopulation              |              | X            | 1                | X        |         |                     | X                 | X           | 1,3     | 1                  | 5    |

| Reference                   | Species diversity |                     |                 |                | Location                         |                                     | Transmission |              |                  |          | Control |                     |                   |             |         | Data               |      |
|-----------------------------|-------------------|---------------------|-----------------|----------------|----------------------------------|-------------------------------------|--------------|--------------|------------------|----------|---------|---------------------|-------------------|-------------|---------|--------------------|------|
|                             | Uniform           | Mixed species farms | Single wildlife | Mixed wildlife | Country                          | Farm connectivity                   | Within farm  | Between farm | Unobserved cases | Carriers | None    | Unspecified / other | Mvmt. Restriction | Vaccination | Culling | Metrics for impact | Host |
| Rich, 2008                  | X                 |                     |                 |                | Argentina<br>Uruguay<br>Paraguay | metapopulation                      |              | X            | 1                | X        |         |                     | X                 | X           | 1       | 1                  | 5    |
| Rivas et al., 2003          | X                 |                     |                 |                | Uruguay                          | homogeneous (2)                     |              | X            |                  |          |         |                     | X                 | X           | 1       | unk                | 1    |
| Rivas et al., 2012          | X                 |                     |                 |                | Uruguay                          | network                             |              | X            |                  |          | X*      |                     |                   |             | 1       | unk                | 5    |
| Savill et al., 2007         |                   | X                   |                 |                | UK                               | kernel (6)                          |              | X            | 1                |          |         | X*                  |                   | X*          | 1       | 1                  | 1    |
| Schley et al., 2009         | X                 |                     |                 |                | UK                               | kernel (2)                          |              | X            |                  |          |         | X                   |                   |             | 1       | 1                  | 4    |
| Schley et al., 2012         | X                 |                     |                 |                | UK                               | n/a                                 | X            |              |                  | X        |         |                     |                   |             | 1       | 3                  | 0    |
| Schoenbaum & Disney, 2003   | X                 |                     |                 |                | US                               | homogeneous (2),<br>network-opinion |              | X            | 1                |          |         |                     | X                 | X           | 1,3     | 2                  | 0    |
| Shea et al., 2014           |                   | X                   |                 |                | UK                               | kernel (1)                          |              | X            | 1                |          |         | X*                  |                   | X*          | 1,3     | 1                  | 4    |
| Thornely & France, 2009     | X                 |                     |                 |                | UK                               | kernel (10)                         | X            | X            | 1,3              |          |         | X                   | X                 | X           | 1       |                    | 4    |
| Tildesley et al., 2006      |                   | X                   |                 |                | UK                               | kernel (1)                          |              | X            | 1                |          |         | X*                  | X                 | X           | 1       | 1                  | 4    |
| Tildesley et al., 2008      |                   | X                   |                 |                | UK                               | kernel (1)                          |              | X            | 1                |          |         | X*                  |                   | X           | 1       | 1                  | 1    |
| Tildesley and Keeling, 2008 |                   | X                   |                 |                | Denmark                          | kernel (1)                          |              | X            | 1                |          |         | X*                  |                   | X           | 1       | 1                  | 4    |
| Tildesley et al., 2009      |                   | X                   |                 |                | UK                               | kernel (1)                          |              | X            | 1                |          |         | X*                  |                   | X           | 1       | 1                  | 4    |
| Tildesley and Keeling, 2009 |                   | X                   |                 |                | UK                               | kernel (1)                          |              | X            | 1                |          |         | X*                  | X                 | X           | 1       | 1                  | 4    |
| Tildesley et al., 2010      |                   | X                   |                 |                | UK, US                           | kernel (1)                          |              | X            | 1                |          |         | X*                  | X                 | X           | 1       | 1,2,4,5            | 4,0  |
| Tildesley et al., 2012      |                   | X                   |                 |                | US                               | kernel (1)                          |              | X            | 1                |          |         | X*                  | X                 | X           | 1       | 2                  | 4    |
| Tildesley and Ryan, 2012    |                   | X                   |                 |                | UK                               | kernel (1)                          |              | X            | 1                |          |         | X*                  | X                 | X           | 1       | 4                  | 4    |
| Tomassen et al., 2002       | X                 |                     |                 |                | Netherlands                      | network                             |              | X            | 1                |          |         | X                   | X                 | X           | 1,3     | 2                  | 0    |
| Traulsen et al., 2010       | X                 |                     |                 |                | Germany                          | network, mvmt                       |              | X            | 1                |          | X       |                     | X                 | X           | 1       | 2                  | 0    |
| Traulsen et al., 2011       | X                 |                     |                 |                | Germany                          | network, mvmt                       |              | X            | 1                |          | X       |                     | X                 | X           | 1       | 2                  | 0    |
| Tsutsui et al., 2003        | X                 |                     |                 |                | Japan                            | homogeneous (1)                     | X            | X            | 3                |          |         | X*                  |                   |             | 1       | 2                  | 1    |
| van den Broek et al., 2007  | X                 |                     |                 |                | UK                               | homogeneous (1)                     |              | X            |                  |          |         | X*                  |                   | X*          | 1       | 0                  | 1    |
| Vergne et al., 2012         | X                 |                     |                 |                | Cambodia                         | n/a                                 |              |              |                  | X        |         |                     |                   |             | 1       | 3                  | 2,3  |
| Vernon et al., 2012         | X                 |                     |                 |                | UK                               | mvmt                                | X            | X            | 1                |          |         | X*                  | X*                | X*          | 1       | 1                  | 0    |

| Reference              | Species diversity |                     |                 |                | Location     |                   | Transmission |              |                  |          | Control |                     |                   |             |         | Data               |      |         |
|------------------------|-------------------|---------------------|-----------------|----------------|--------------|-------------------|--------------|--------------|------------------|----------|---------|---------------------|-------------------|-------------|---------|--------------------|------|---------|
|                        | Uniform           | Mixed species farms | Single wildlife | Mixed wildlife | Country      | Farm connectivity | Within farm  | Between farm | Unobserved cases | Carriers | None    | Unspecified / other | Mvmt. Restriction | Vaccination | Culling | Metrics for impact | Host | Disease |
| Ward et al., 2007      | X                 |                     |                 | X              | US           | local interaction |              | X            | 1                |          | X       |                     |                   |             |         | 1                  | 4,5  | 0       |
| Ward et al., 2009a     |                   |                     |                 | X              | US           | local interaction |              | X            | 1                |          | X       |                     |                   |             |         | 1                  | 4,5  | 0       |
| Woolhouse et al., 1996 | X                 |                     |                 |                | Saudi Arabia | n/a               | X            |              | 1                |          |         |                     | X                 |             |         | 1                  | 5    | 1       |
| Woolhouse et al., 1997 | X                 |                     |                 |                | Saudi Arabia | n/a               | X            |              | 1                |          |         |                     | X                 |             |         | 1                  | 5    | 1       |
| Xiang and Neal, 2014   |                   | X                   |                 |                | UK           | kernel (9)        |              | X            |                  |          |         |                     | X*                |             | X*      | 1                  | 1    | 1       |



**Table S3. Citations for Interspread, AusSpread, and NAADSM model use.**

| <b>Location and dates of FMD outbreak</b>    | <b>Model</b>                                 | <b>Citation</b>                                                                       |
|----------------------------------------------|----------------------------------------------|---------------------------------------------------------------------------------------|
| Australia,<br>Simulated outbreak             | AusSpread                                    | Garner & Becket, 2005<br>Roche et al., 2014<br>East et al., 2014<br>Ward et al., 2015 |
| Canada,<br>Simulated outbreak                | Interspread<br>Plus                          | Sanson et al., 2014                                                                   |
| Denmark,<br>Simulated outbreak               | Interspread<br>Plus                          | Halasa et al., 2014 (March)                                                           |
| Netherlands,<br>2001 outbreak                | InterSpread                                  | Velthuis & Mourits, 2007                                                              |
| Netherlands,<br>Simulated outbreak           | Interspread                                  | Ge et al., 2010                                                                       |
| New Zealand,<br>Simulated outbreak           | Interspread                                  | Sanson et al., 1993<br>Owen 2011                                                      |
| Republic of Ireland,<br>Simulated outbreak   | AusSpread<br>InterSpread<br>NAADSM           | Sanson et al., 2011<br>Sanson et al., 2011<br>Sanson et al., 2011                     |
| Republic of Korea,<br>2002 outbreak          | Interspread                                  | Yoon et al., 2006                                                                     |
| Spain,<br>Simulated outbreak                 | InterSpread                                  | Martinez-Lopez et al., 2010                                                           |
| UK,<br>2001 outbreak                         | InterSpread                                  | Morris et al., 2001                                                                   |
| USA,<br>Simulated outbreak                   | AusSpread<br>AusSpread<br>NAADSM             | Ward et al., 2009<br>Hagerman al., 2013<br>McReynolds et al., 2014                    |
| Hypothetical location,<br>Simulated outbreak | AusSpread<br>InterSpread<br>NAADSM<br>NAADSM | Dube et al., 2007<br>Dube et al., 2007<br>Dube et al., 2007<br>Harvey et al., 2007    |

## References

- Ap Dewi, I., B. Molina-Flores and G. Edwards-Jones, 2004: A generic spreadsheet model of a disease epidemic with application to the first 100 days of the 2001 outbreak of foot-and-mouth disease in the UK. *The Veterinary Journal*, 167, 167-174.
- Arnold, M. E., D. J. Paton, E. Ryan, J. W. Wilesmith and S. J. Cox, 2008: Modelling studies to estimate the prevalence of foot-and-mouth disease carriers after reactive vaccination. *Proceedings of the Royal Society B-Biological Sciences*, 275, 107-115.
- Backer, J. A., T. J. Hagenaars, G. Nodelijk and H. J. W. van Roermund, 2012: Vaccination against foot-and-mouth disease I: Epidemiological consequences. *Preventive Veterinary Medicine*, 107, 27-40.
- Bajardi, P., A. Barrat, L. Savini and V. Colizza, 2012: Optimizing surveillance for livestock disease spreading through animal movements. *Journal of the Royal Society Interface*, 9, 2814-2825.
- Bates, T. W., M. C. Thurmond and T. E. Carpenter, 2003a: Description of an epidemic simulation model for use in evaluating strategies to control an outbreak of foot-and-mouth disease. *American Journal of Veterinary Research*, 64, 195-204.
- Bates, T. W., M. C. Thurmond and T. E. Carpenter, 2003b: Results of epidemic simulation modeling to evaluate strategies to control an outbreak of foot-and-mouth disease. *American Journal of Veterinary Research*, 64, 205-210.
- Boender, G. J., H. J. W. van Roermund, M. C. M. de Jong and T. J. Hagenaars, 2010: Transmission risks and control of foot-and-mouth disease in The Netherlands: Spatial patterns. *Epidemics*, 2, 36-47.
- Boklund, A., T. Halasa, L. E. Christiansen and C. Enøe, 2013: Comparing control strategies against foot-and-mouth disease: Will vaccination be cost-effective in Denmark? *Preventive Veterinary Medicine*, 111, 206-219.
- Bouma, A., A. R. W. Elbers, A. Dekker, A. de Koeijer, C. Bartels, P. Vellema, P. van der Wal, E. M. A. van Rooij, F. H. Pluimers and M. C. M. de Jong, 2003: The foot-and-mouth disease epidemic in The Netherlands in 2001. *Preventive Veterinary Medicine*, 57, 155-166.
- Buhnerkempe, M. G., M. J. Tildesley, T. Lindström, D. A. Grear, K. Portacci, R. S. Miller, J. E. Lombard, M. Werkman, M. J. Keeling, U. Wennergren and C. T. Webb, 2014: The Impact of Movements and Animal Density on Continental Scale Cattle Disease Outbreaks in the United States. *PLoS ONE*, 9, e91724.
- Carpenter, T. E., L. E. Christiansen, B. E. Dickey, C. Thunes and P. J. Hullinger, 2007: Potential impact of an introduction of foot-and-mouth disease into the California State Fair. *Javma-Journal of the American Veterinary Medical Association*, 231, 1231-1235.

- Carpenter, T. E., J. M. O'Brien, A. D. Hagerman and B. A. McCarl, 2011: Epidemic and economic impacts of delayed detection of foot-and-mouth disease: a case study of a simulated outbreak in California. *Journal of Veterinary Diagnostic Investigation*, 23, 26-33.
- Chis Ster, I., P. J. Dodd and N. M. Ferguson, 2012: Within-farm transmission dynamics of foot and mouth disease as revealed by the 2001 epidemic in Great Britain. *Epidemics*, 4, 158-169.
- Chis Ster, I. and N. M. Ferguson, 2007: Transmission parameters of the 2001 foot and mouth epidemic in Great Britain. *Plos One*, 2, e502-e502.
- Chis Ster, I., B. K. Singh and N. M. Ferguson, 2009: Epidemiological inference for partially observed epidemics: the example of the 2001 foot and mouth epidemic in Great Britain. *Epidemics*, 1, 21-34.
- Chowell, G., A. L. Rivas, N. W. Hengartner, J. M. Hyman and C. Castillo-Chavez, 2006: The role of spatial mixing in the spread of foot-and-mouth disease. *Preventive Veterinary Medicine*, 73, 297-314.
- Deardon, R., S. P. Brooks, B. T. Grenfell, M. J. Keeling, M. J. Tildesley, N. J. Savill, D. J. Shaw and M. E. J. Woolhouse, 2010: Inference for individual-level models of infectious diseases in large populations. *Statistica Sinica*, 20, 239-261.
- Deardon, R., B. Habibzadeh and H. Y. Chung, 2012: Spatial measurement error in infectious disease models. *Journal of Applied Statistics*, 39, 1139-1150.
- Dexter, N., 2003: Stochastic models of foot and mouth disease in feral pigs in the Australian semi-arid rangelands. *Journal of Applied Ecology*, 40, 293-306.
- Dickey, B. E., T. E. Carpenter and S. M. Bartell, 2008: Use of heterogeneous operation-specific contact parameters changes predictions for foot-and-mouth disease outbreaks in complex simulation models. *Preventive Veterinary Medicine*, 87, 272-287.
- Diggle, P. J., 2006: Spatio-temporal point processes, partial likelihood, foot and mouth disease. *Statistical Methods in Medical Research*, 15, 325-336.
- Dijkhuizen, A. A., 1989: Epidemiological and economic-evaluation of foot-and-mouth-disease control strategies in the Netherlands. *Netherlands Journal of Agricultural Science*, 37, 1-12.
- Doran, R. J. and S. W. Laffan, 2005: Simulating the spatial dynamics of foot and mouth disease outbreaks in feral pigs and livestock in Queensland, Australia, using a susceptible-infected-recovered cellular automata model. *Preventive Veterinary Medicine*, 70, 133-152.

- Dube, C., M. A. Stevenson, M. G. Garner, R. L. Sanson, B. A. Corso, N. Harvey, J. Griffin, J. W. Wilesmith and C. Estrada, 2007: A comparison of predictions made by three simulation models of foot-and-mouth disease. *New Zealand Veterinary Journal*, 55, 280-288.
- Durand, B. and O. Mahul, 1999: An extended state-transition model for foot-and-mouth disease epidemics in France. *Preventive Veterinary Medicine*, 47, 121-139.
- East, I. J., S. E. Roche, R. M. Wicks, K. de Witte and M. G. Garner, 2014: Options for managing animal welfare on intensive pig farms confined by movement restrictions during an outbreak of foot and mouth disease. *Preventive Veterinary Medicine*, 117, 533-541.
- Estrada, C., A. M. Perez and M. C. Turmond, 2008: Herd reproduction ratio and time-space analysis of a foot-and-mouth disease epidemic in Peru in 2004. *Transboundary and Emerging Diseases*, 55, 284-292.
- Ferguson, N. M., C. A. Donnelly and R. M. Anderson, 2001a: The foot-and-mouth epidemic in Great Britain: Pattern of spread and impact of interventions. *Science*, 292, 1155-1160.
- Ferguson, N. M., C. A. Donnelly and R. M. Anderson, 2001b: Transmission intensity and impact of control policies on the foot and mouth epidemic in Great Britain. *Nature*, 413, 542-548.
- Garner, M. G. and S. D. Beckett, 2005: Modelling the spread of foot-and-mouth disease in Australia. *Australian Veterinary Journal*, 83, 758-766.
- Garner, M. G. and M. B. Lack, 1995a: An evaluation of alternate control strategies for foot-and-mouth-disease in Australia - a regional approach. *Preventive Veterinary Medicine*, 23, 9-32.
- Garner, M. G. and M. B. Lack, 1995b: Modeling the potential impact of exotic diseases on regional Australia. *Australian Veterinary Journal*, 72, 81-87.
- Ge, L., M. C. M. Mourits, A. R. Kristensen and R. B. M. Huirne, 2010: A modelling approach to support dynamic decision-making in the control of FMD epidemics. *Preventive Veterinary Medicine*, 95, 167-174.
- Gerbier, G., J. N. Bacro, R. Pouillot, B. Durand, F. Moutou and J. Chadoeuf, 2002: A point pattern model of the spread of foot-and-mouth disease. *Preventive Veterinary Medicine*, 56, 33-49.
- Gilbert, M., S. Aktas, H. Mohammed, P. Roeder, K. Sumption, M. Tufan and J. Slingenbergh, 2005: Patterns of spread and persistence of foot-and-mouth disease types A, O and Asia-1 in Turkey: a meta-population approach. *Epidemiology and Infection*, 133, 537-545.

- Green, D. M., I. Z. Kiss and R. R. Kao, 2006: Modelling the initial spread of foot-and-mouth disease through animal movements. *Proceedings of the Royal Society B-Biological Sciences*, 273, 2729-2735.
- Hagerman, A. D., M. P. Ward, D. P. Anderson, J. C. Looney and B. A. McCarl, 2013: Rapid effective trace-back capability value: A case study of foot-and-mouth in the Texas High Plains. *Preventive Veterinary Medicine*, 110, 323-328.
- Halasa, T. and A. Boklund, 2014: The Impact of Resources for Clinical Surveillance on the Control of a Hypothetical Foot-and-Mouth Disease Epidemic in Denmark. *PLoS ONE*, 9, e102480.
- Halasa, T., A. Boklund, A. Stockmarr, C. Enøe and L. E. Christiansen, 2014: A Comparison between Two Simulation Models for Spread of Foot-and-Mouth Disease. *PLoS ONE*, 9, e92521.
- Halasa, T., P. Willeberg, L. E. Christiansen, A. Boklund, M. AlKhamis, A. Perez and C. Enøe, 2013: Decisions on control of foot-and-mouth disease informed using model predictions. *Preventive Veterinary Medicine*, 112, 194-202.
- Handel, I. G., B. M. d. C. Bronsvoort, J. F. Forbes and M. E. J. Woolhouse, 2011: Risk-Targeted Selection of Agricultural Holdings for Post-Epidemic Surveillance: Estimation of Efficiency Gains. *Plos One*, 6.
- Harvey, N., A. Reeves, M. A. Schoenbaum, F. J. Zagmutt-Vergara, C. Dub, A. E. Hill, B. A. Corso, W. B. McNab, C. I. Cartwright and M. D. Salman, 2007: The North American Animal Disease Spread Model: A simulation model to assist decision making in evaluating animal disease incursions. *Preventive Veterinary Medicine*, 82, 176-197.
- Hayama, Y., T. Yamamoto, S. Kobayashi, N. Muroga and T. Tsutsui, 2013: Mathematical model of the 2010 foot-and-mouth disease epidemic in Japan and evaluation of control measures. *Preventive Veterinary Medicine*, 112, 183-193.
- Haydon, D. T., M. E. J. Woolhouse and R. P. Kitching, 1997: An analysis of foot-and-mouth-disease epidemics in the UK. *IMA Journal of Mathematics Applied in Medicine and Biology*, 14, 1-9.
- Heuer, C., N. P. French, R. Jackson and G. F. Mackereth, 2007: Application of modelling to determine the absence of foot-and-mouth disease in the face of a suspected incursion. *New Zealand Veterinary Journal*, 55, 289-296.
- Highfield, L., M. P. Ward and S. W. Laffan, 2008: Representation of animal distributions in space: how geostatistical estimates impact simulation modeling of foot-and-mouth disease spread. *Veterinary Research*, 39.

- Highfield, L. D., M. P. Ward, S. W. Laffan, B. Norby and G. Wagner, 2009: The impact of seasonal variability in wildlife populations on the predicted spread of foot and mouth disease. *Veterinary Research*, 40.
- Highfield, L. D., M. P. Ward, S. W. Laffan, B. Norby and G. G. Wagner, 2010a: Critical parameters for modelling the spread of foot-and-mouth disease in wildlife. *Epidemiology and Infection*, 138, 125-138.
- Highfield, L. D., M. P. Ward, S. W. Laffan, B. Norby and G. G. Wagner, 2010b: The impact of potential mitigation strategies on the predicted spread of foot and mouth disease in white-tailed deer in south Texas. *Preventive Veterinary Medicine*, 94, 282-288.
- Hone, J. and R. Pech, 1990: Disease surveillance in wildlife with emphasis on detecting foot-and-mouth-disease in feral pigs. *Journal of Environmental Management*, 31, 173-184.
- Hosseinkashi, Y., S. Chenouri, C. G. Small and R. Deardon, 2012: A stochastic graph process for epidemic modelling. *Canadian Journal of Statistics-Revue Canadienne De Statistique*, 40, 55-67.
- Howard, S. C. and C. A. Donnelly, 2000: The importance of immediate destruction in epidemics of foot and mouth disease. *Research in Veterinary Science*, 69, 189-196.
- Hughjones, M. E., 1976: Simulation spatial model of spread of foot-and-mouth-disease through primary movement of milk. *Journal of Hygiene*, 77, 1-9.
- Hutber, A. M. and R. P. Kitching, 1996: The use of vector transition in the modelling of intraherd foot-and-mouth disease. *Environmental and Ecological Statistics*, 3, 245-255.
- Hutber, A. M., R. P. Kitching and D. A. Conway, 1998: Control of foot-and-mouth disease through vaccination and the isolation of infected animals. *Tropical Animal Health and Production*, 30, 217-227.
- Jewell, C. P., M. J. Keeling and G. O. Roberts, 2009: Predicting undetected infections during the 2007 foot-and-mouth disease outbreak. *Journal of the Royal Society Interface*, 6, 1145-1151.
- Kao, R. R., 2003: The impact of local heterogeneity on alternative control strategies for foot-and-mouth disease. *Proceedings of the Royal Society B-Biological Sciences*, 270, 2557-2564.
- Kao, R. R., L. Danon, D. M. Green and I. Z. Kiss, 2006: Demographic structure and pathogen dynamics on the network of livestock movements in Great Britain. *Proceedings of the Royal Society B-Biological Sciences*, 273, 1999-2007.

- Kao, R. R., D. M. Green, J. Johnson and I. Z. Kiss, 2007: Disease dynamics over very different time-scales: foot-and-mouth disease and scrapie on the network of livestock movements in the UK. *Journal of the Royal Society Interface*, 4, 907-916.
- Keeling, M. J., M. E. J. Woolhouse, R. M. May, G. Davies and B. T. Grenfell, 2003: Modelling vaccination strategies against foot-and-mouth disease. *Nature*, 421, 136-142.
- Keeling, M. J., M. E. J. Woolhouse, D. J. Shaw, L. Matthews, M. Chase-Topping, D. T. Haydon, S. J. Cornell, J. Kappey, J. Wilesmith and B. T. Grenfell, 2001: Dynamics of the 2001 UK foot and mouth epidemic: Stochastic dispersal in a heterogeneous landscape. *Science*, 294, 813-817.
- Kiss, I. Z., D. M. Green and R. R. Kao, 2005: Disease contact tracing in random and clustered networks. *Proceedings of the Royal Society B-Biological Sciences*, 272, 1407-1414.
- Kiss, I. Z., D. M. Green and R. R. Kao, 2006: The network of sheep movements within Great Britain: network properties and their implications for infectious disease spread. *Journal of the Royal Society Interface*, 3, 669-677.
- Klaring, W. J. and W. Timischl, 1979: Mathematical models for the spread and control of foot-and-mouth disease during the 1973 epidemic in Austria. *Biometrical Journal*, 21, 675-680.
- Klinkenberg, D., C. Fraser and H. Heesterbeek, 2006: The Effectiveness of Contact Tracing in Emerging Epidemics. *Plos One*, 1.
- Kobayashi, M., T. E. Carpenter, B. F. Dickey and R. E. Howitt, 2007a: A dynamic, optimal disease control model for foot-and-mouth disease: I. Model description. *Preventive Veterinary Medicine*, 79, 257-273.
- Kobayashi, M., T. E. Carpenter, B. F. Dickey and R. E. Howitt, 2007b: A dynamic, optimal disease control model for foot-and-mouth-disease: II. Model results and policy implications. *Preventive Veterinary Medicine*, 79, 274-286.
- Laffan, S. W., Z. Wang and M. P. Ward, 2011: The effect of neighbourhood definitions on spatio-temporal models of disease outbreaks: Separation distance versus range overlap. *Preventive Veterinary Medicine*, 102, 218-229.
- Lawson, A. B., G. Onicescu and C. Ellerbe, 2011: Foot and mouth disease revisited: re-analysis using Bayesian spatial susceptible-infectious-removed models. *Spatial and spatio-temporal epidemiology*, 2, 185-194.
- Le Menach, A., J. Legrand, R. F. Grais, C. Viboud, A. J. Valleron and A. Flahault, 2005: Modeling spatial and temporal transmission of foot-and-mouth disease in France: identification of high-risk areas. *Veterinary Research*, 36, 699-712.

- Lindstrom, T., S. S. Lewerin and U. Wennergren, 2012: Influence on disease spread dynamics of herd characteristics in a structured livestock industry. *Journal of the Royal Society Interface*, 9, 1287-1294.
- Lindstrom, T., S. A. Sisson, S. S. Lewerin and U. Wennergren, 2011: Bayesian analysis of animal movements related to factors at herd and between herd levels: Implications for disease spread modeling. *Preventive Veterinary Medicine*, 98, 230-242.
- Mardones, F. O., H. zu Donha, C. Thunes, V. Velez and T. E. Carpenter, 2013: The value of animal movement tracing: A case study simulating the spread and control of foot-and-mouth disease in California. *Preventive Veterinary Medicine*, 110, 133-138.
- Martínez-López, B., B. Ivorra, E. Fernández-Carrión, A. M. Perez, A. Medel-Herrero, F. Sánchez-Vizcaíno, C. Gortázar, A. M. Ramos and J. M. Sánchez-Vizcaíno, 2014: A multi-analysis approach for space-time and economic evaluation of risks related with livestock diseases: The example of FMD in Peru. *Preventive Veterinary Medicine*, 114, 47-63.
- Martinez-Lopez, B., A. M. Perez and J. M. Sanchez-Vizcaino, 2010: A simulation model for the potential spread of foot-and-mouth disease in the Castile and Leon region of Spain. *Preventive Veterinary Medicine*, 96, 19-29.
- Matthews, L., D. T. Haydon, D. J. Shaw, M. E. Chase-Topping, M. J. Keeling and M. E. J. Woolhouse, 2003: Neighbourhood control policies and the spread of infectious diseases. *Proceedings of the Royal Society B-Biological Sciences*, 270, 1659-1666.
- McReynolds, S. W., M. W. Sanderson, A. Reeves and A. E. Hill, 2014: Modeling the impact of vaccination control strategies on a foot and mouth disease outbreak in the Central United States. *Preventive Veterinary Medicine*, 117, 487-504.
- Morris, R. S., J. W. Wilesmith, M. W. Stern, R. L. Sanson and M. A. Stevenson, 2001: Predictive spatial modelling of alternative control strategies for the foot-and-mouth disease epidemic in Great Britain, 2001. *Veterinary Record*, 149, 137-+.
- Orton, R. J., P. R. Bessell, C. P. D. Birch, A. O'Hare and R. R. Kao, 2012: Risk of Foot-and-Mouth Disease spread due to sole occupancy authorities and linked cattle holdings. *Plos One*, 7, e35089-e35089.
- Owen, K., M. A. Stevenson and R. L. Sanson, 2011: A sensitivity analysis of the New Zealand standard model of foot and mouth disease. *Revue Scientifique Et Technique-Office International Des Epizooties*, 30, 513-526.
- Parham, P. E., B. K. Singh and N. M. Ferguson, 2008: Analytic approximation of spatial epidemic models of foot and mouth disease. *Theoretical Population Biology*, 73, 349-368.



- Pech, R. P. and J. Hone, 1988: A model of the dynamics and control of an outbreak of foot and mouth-disease in feral pigs in Australia. *Journal of Applied Ecology*, 25, 63-77.
- Pech, R. P. and J. C. McIlroy, 1990: A model of the velocity of advance of foot-and-mouth-disease in feral pigs. *Journal of Applied Ecology*, 27, 635-650.
- Pineda-Krch, M., J. M. O'Brien, C. Thunes and T. E. Carpenter, 2010: Potential impact of introduction of foot-and-mouth disease from wild pigs into commercial livestock premises in California. *American Journal of Veterinary Research*, 71, 82-88.
- Porphyre, T., H. K. Auty, M. J. Tildesley, G. J. Gunn and M. E. J. Woolhouse, 2013: Vaccination against Foot-And-Mouth Disease: Do Initial Conditions Affect Its Benefit? *PLoS ONE*, 8, e77616.
- Rautureau, S., B. Dufour and B. Durand, 2012: Structuring the Passive Surveillance Network Improves Epizootic Detection and Control Efficacy: A Simulation Study on Foot-and-Mouth Disease in France. *Transboundary and Emerging Diseases*, 59, 311-322.
- Rich, K. M., 2008: An interregional system dynamics model of animal disease control: applications to foot-and-mouth disease in the Southern Cone of South America. *System Dynamics Review*, 24, 67-96.
- Rich, K. M. and A. Winter-Nelson, 2007: An integrated epidemiological-economic analysis of foot and mouth disease: Applications to the Southern Cone of South America. *American Journal of Agricultural Economics*, 89, 682-697.
- Rivas, A. L., F. O. Fasina, A. L. Hoogesteyn, S. N. Konah, J. L. Febles, D. J. Perkins, J. M. Hyman, J. M. Fair, J. B. Hittner and S. D. Smith, 2012: Connecting Network Properties of Rapidly Disseminating Epizoonotics. *Plos One*, 7.
- Rivas, A. L., S. E. Tennenbaum, J. P. Aparicio, A. L. Hoogesteijn, H. O. Mohammed, C. Castillo-Chavez and S. J. Schwager, 2003: Critical response time (time available to implement effective measures for epidemic control): Model building and evaluation. *Canadian Journal of Veterinary Research-Revue Canadienne De Recherche Veterinaire*, 67, 307-311.
- Roche, S. E., M. G. Garner, R. M. Wicks, I. J. East and K. de Witte, 2014: How do resources influence control measures during a simulated outbreak of foot and mouth disease in Australia? *Preventive Veterinary Medicine*, 113, 436-446.
- Sanson, R. L., C. Dubé, S. C. Cork, R. Frederickson and C. Morley, 2014: Simulation modelling of a hypothetical introduction of foot-and-mouth disease into Alberta. *Preventive Veterinary Medicine*, 114, 151-163.
- Sanson, R. L., N. Harvey, M. G. Garner, M. A. Stevenson, T. M. Davies, M. L. Hazelton, J. O'Connor, C. Dube, K. N. Forde-Folle and K. Owen, 2011: Foot and mouth disease

- model verification and 'relative validation' through a formal model comparison. *Revue Scientifique Et Technique-Office International Des Epizooties*, 30, 527-540.
- Sanson, R. L., G. Struthers, P. King, J. F. Weston and R. S. Morris, 1993: The potential extent of transmission of foot-and-mouth-disease - a study of the movement of animals and materials in Southland, New-Zealand. *New Zealand Veterinary Journal*, 41, 21-28.
- Savill, N. J., D. J. Shaw, R. Deardon, M. J. Tildesley, M. J. Keeling, M. E. J. Woolhouse, S. P. Brooks and B. T. Grenfell, 2007: Effect of data quality on estimates of farm infectiousness trends in the UK 2001 foot-and-mouth disease epidemic. *Journal of the Royal Society Interface*, 4, 235-241.
- Schley, D., S. Gubbins and D. J. Paton, 2009: Quantifying the Risk of Localised Animal Movement Bans for Foot-and-Mouth Disease. *Plos One*, 4.
- Schley, D., S. Whittle, M. Taylor and I. Z. Kiss, 2012: Models to capture the potential for disease transmission in domestic sheep flocks. *Preventive Veterinary Medicine*, 106, 174-184.
- Schoenbaum, M. A. and W. T. Disney, 2003: Modeling alternative mitigation strategies for a hypothetical outbreak of foot-and-mouth disease in the United States. *Preventive Veterinary Medicine*, 58, 25-52.
- Shea, K., M. J. Tildesley, M. C. Runge, C. J. Fonnesebeck and M. J. Ferrari, 2014: Adaptive Management and the Value of Information: Learning Via Intervention in Epidemiology. *PLoS Biol*, 12, e1001970.
- Thornley, J. H. M. and J. France, 2009: Modelling foot and mouth disease. *Preventive Veterinary Medicine*, 89, 139-154.
- Tildesley, M. J., P. R. Bessell, M. J. Keeling and M. E. J. Woolhouse, 2009: The role of pre-emptive culling in the control of foot-and-mouth disease. *Proceedings of the Royal Society B-Biological Sciences*, 276, 3239-3248.
- Tildesley, M. J., R. Deardon, N. J. Savill, P. R. Bessell, S. P. Brooks, M. E. J. Woolhouse, B. T. Grenfell and M. J. Keeling, 2008: Accuracy of models for the 2001 foot-and-mouth epidemic. *Proceedings of the Royal Society B-Biological Sciences*, 275, 1459-1468.
- Tildesley, M. J., T. A. House, M. C. Bruhn, R. J. Curry, M. O'Neil, J. L. E. Allpress, G. Smith and M. J. Keeling, 2010: Impact of spatial clustering on disease transmission and optimal control. *Proceedings of the National Academy of Sciences of the United States of America*, 107, 1041-1046.
- Tildesley, M. J. and M. J. Keeling, 2008: Modelling foot-and-mouth disease: A comparison between the UK and Denmark. *Preventive Veterinary Medicine*, 85, 107-124.

- Tildesley, M. J. and M. J. Keeling, 2009: Is R-0 a good predictor of final epidemic size: Foot-and-mouth disease in the UK. *Journal of Theoretical Biology*, 258, 623-629.
- Tildesley, M. J. and S. J. Ryan, 2012: Disease prevention versus data privacy: using landcover maps to inform spatial epidemic models. *Plos Computational Biology*, 8, e1002723-e1002723.
- Tildesley, M. J., N. J. Savill, D. J. Shaw, R. Deardon, S. P. Brooks, M. E. J. Woolhouse, B. T. Grenfell and M. J. Keeling, 2006: Optimal reactive vaccination strategies for a foot-and-mouth outbreak in the UK. *Nature*, 440, 83-86.
- Tildesley, M. J., G. Smith and M. J. Keeling, 2012: Modeling the spread and control of foot-and-mouth disease in Pennsylvania following its discovery and options for control. *Preventive Veterinary Medicine*, 104, 224-239.
- Tomassen, F. H. M., A. de Koeijer, M. C. M. Mourits, A. Dekker, A. Bouma and R. B. M. Huirne, 2002: A decision-tree to optimise control measures during the early stage of a foot-and-mouth disease epidemic. *Preventive Veterinary Medicine*, 54, 301-324.
- Traulsen, I., G. Rave and J. Krieter, 2010: Sensitivity analysis of a stochastic simulation model for foot and mouth disease. *Archiv Fur Tierzucht-Archives of Animal Breeding*, 53, 529-544.
- Traulsen, I., G. Rave, J. Teuffert and J. Krieter, 2011: Consideration of different outbreak conditions in the evaluation of preventive culling and emergency vaccination to control foot and mouth disease epidemics. *Research in Veterinary Science*, 91, 219-224.
- Tsutsui, T., N. Minami, M. Koiwai, T. Hamaoka, I. Yamane and K. Shimura, 2003: A stochastic-modeling evaluation of the foot-and-mouth-disease survey conducted after the outbreak in Miyazaki, Japan in 2000. *Preventive Veterinary Medicine*, 61, 45-58.
- van den Broek, J. and H. Heesterbeek, 2007: Nonhomogeneous birth and death models for epidemic outbreak data. *Biostatistics*, 8, 453-467.
- Velthuis, A. G. J. and M. C. M. Mourits, 2007: Effectiveness of movement-prevention regulations to reduce the spread of foot-and-mouth disease in The Netherlands. *Preventive Veterinary Medicine*, 82, 262-281.
- Vergne, T., V. Grosbois, B. Durand, F. Goutard, C. Bellet, D. Holl, F. Roger and B. Dufour, 2012: A capture-recapture analysis in a challenging environment: Assessing the epidemiological situation of foot-and-mouth disease in Cambodia. *Preventive Veterinary Medicine*, 105, 235-243.
- Vernon, M. C. and M. J. Keeling, 2012: Impact of regulatory perturbations to disease spread through cattle movements in Great Britain. *Preventive Veterinary Medicine*, 105, 110-117.

- Ward, M. P., M. G. Garner and B. D. Cowled, 2015: Modelling foot-and-mouth disease transmission in a wild pig–domestic cattle ecosystem. *Australian Veterinary Journal*, 93, 4-12.
- Ward, M. P., L. D. Highfield, P. Vongseng and M. G. Garner, 2009a: Simulation of foot-and-mouth disease spread within an integrated livestock system in Texas, USA. *Preventive Veterinary Medicine*, 88, 286-297.
- Ward, M. P., S. W. Laffan and L. D. Highfield, 2007: The potential role of wild and feral animals as reservoirs of foot-and-mouth disease. *Preventive Veterinary Medicine*, 80, 9-23.
- Ward, M. P., S. W. Laffan and L. D. Highfield, 2009b: Modelling spread of foot-and-mouth disease in wild white-tailed deer and feral pig populations using a geographic-automata model and animal distributions. *Preventive Veterinary Medicine*, 91, 55-63.
- Woolhouse, M. E. J., D. T. Haydon and D. A. P. Bundy, 1997: The design of veterinary vaccination programmes. *Veterinary Journal*, 153, 41-47.
- Woolhouse, M. E. J., D. T. Haydon, A. Pearson and R. P. Kitching, 1996: Failure of vaccination to prevent outbreaks of foot-and-mouth disease. *Epidemiology and Infection*, 116, 363-371.
- Xiang, F. and P. Neal, 2014: Efficient MCMC for temporal epidemics via parameter reduction. *Computational Statistics & Data Analysis*, 80, 240-250.
- Yoon, H., S. H. Wee, M. A. Stevenson, B. D. O'Leary, R. S. Morris, I. J. Hwang, C. K. Park and M. W. Stern, 2006: Simulation analyses to evaluate alternative control strategies for the 2002 foot-and-mouth disease outbreak in the Republic of Korea. *Preventive Veterinary Medicine*, 74, 212-225.
